# Supplementary material for: Facile and green synthesis of mesoporous Co3O4 nanocubes and their applications for supercapacitors
Source: Royal Society of Chemistry journal article supplement (doi:10.1039/c3nr00495c), 2013-01-01
Supplement: c3nr00495c.pdf [file c3nr00495c.pdf]

## Electronic Supplementary Information (ESI)

### Facile and Green Synthesis of Mesoporous $\text{Co}_3\text{O}_4$ Nanocubes and its Applications for Supercapacitor

Xiangmei Liu,<sup>†</sup> Qing Long,<sup>†</sup> Chunhui Jiang,<sup>†</sup> Beibei Zhan,<sup>†</sup> Chen Li,<sup>†</sup> Shujuan Liu,<sup>†</sup>  
Qiang Zhao,<sup>†</sup> Wei Huang<sup>\*,‡</sup> and Xiaochen Dong<sup>\*,†,‡</sup>

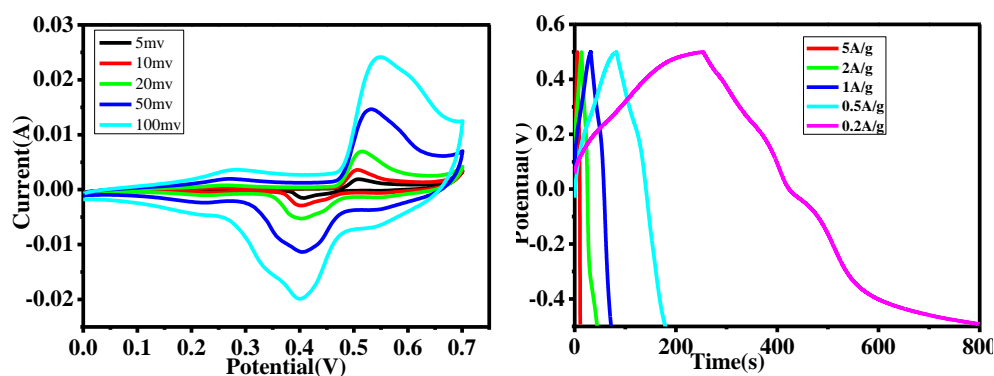

**Fig. S1** Electrochemical performance of the pure  $\text{Co}_3\text{O}_4$  nanocubes electrodes measured in 6.0 M KOH solution. (a) CV curves of mesoporous  $\text{Co}_3\text{O}_4$  nanocubes electrode at scan rates of 5, 10, 20, 50 and 100  $\text{mV s}^{-1}$ . (b) Galvanostatic charge/discharge curves of the as-prepared electrode at different current densities.
